# Supplementary material
Source: Springer Nature journal article supplement (https://www.springermedizin.de/resource/supplementary/12885_2013_4073_MOESM1_ESM.pdf/9465244)
Supplement: MOESM1 [file 9465244]

**Assess for eligibility  
Department of Hematology**

**Centre HH**

**Centre RH**

**Centre HH**

Eligible patients (n=35)  
Randomized

**Centre RH**

Eligible patients (n=35)  
Randomized

Enrollment  
Intervention group  
N= 17

Enrollment  
Usual care group  
N= 18

Enrollment  
Intervention group  
N= 18

Enrollment  
Usual care  
group N= 17

Complete study (n=35)

Complete study (n=35)

Total number completed n=70
